# Supplementary material for: CoFish: co-designing citizen science between fishers and scientists to monitor the phosphorus distribution across two Lake Geneva basins
Source: Research Square preprint supplement (doi:10.21203/rs.3.rs-6170350/v1), 2025-05-07
Supplement: Supplementary file 1 [file 2bffe3f280f09dd96a0f315c.xlsx]

## Sheet: Sheet1
Basin	Station	Transect	Lat (decimal)	Long(decimal)	Campaign 1	Campaign 2	Campaign 3	Campaign 4
Grand	CRG 21	Embouchure Dranse	46.4144	6.52649	YD-MP-MlF	YD-MP-MlF	YD-MP-MlF	YD-MP-MlF
Grand	CRG 22	Haut Lac	46.4322	6.82064	JCD	CH-ER	CH-ER	BdL-ER
Grand	CRG 23	Canyon du Rhône	46.4093	6.81047	JCD	CH-ER	PV	BdL-ER
Grand	CRG 24	Est Grande Plaine	46.4395	6.69041	JJ	JJ	JJ	JJ
Grand	CRG1	Rolle-Thonon	46.3825	6.4723	YR	YR-SC-MG	YR-SC-MG	PA-MG
Grand	CRG10	Ouchy- Evian	46.4684	6.59069	MD	MD	MD	MD
Grand	CRG11	Ouchy- Evian	46.4235	6.58436	MD	MD	MD	MD
Grand	CRG12	Ouchy- Evian	46.41	6.5825	MD	MD	MD	MD
Grand	CRG2	Rolle-Thonon	46.4025	6.43515	YD-MP-MlF	YD-MP-MlF	YD-MP-MlF	YD-MP-MlF
Grand	CRG3	Rolle-Thonon	46.4197	6.40452	YD-MP-MlF	AF-LF	AF-LF	AF-LF
Grand	CRG4	Rolle-Thonon	46.4403	6.36651	AF-LF-MA	AF-LF	AF-LF	AF-LF
Grand	CRG8	Ouchy- Evian	46.5003	6.59512	YR-TJ	YR-SC-MG	YR-SC-MG	PA-MG
Grand	CRG9	Ouchy- Evian	46.4898	6.59374	YR-TJ	YR-SC-MG	YR-SC-MG	PA-MG
Grand	SHL1	Large de Thonon	46.3935	6.44792	YD-MP-MlF	YD-MP-MlF	YD-MP-MlF	YD-MP-MlF
Grand	SHL2	Centre Lac	46.4527	6.58872	MD	MD	MD	MD
Grand	SHL6	Evian	46.4046	6.59532	MD	MD	MD	MD
Grand	VD1	Montreux	46.4368	6.90334	JJS	CH-ER	CH-ER	BdL-ER
Grand	VD2	Vevey	46.4494	6.85598	JJS	CH-ER	CH-ER	BdL-ER
Grand	VD3	Rivaz	46.472	6.78242	JCD	CH-ER	CH-ER	BdL-ER
Grand	VD4	Vidy- Lausanne	46.5067	6.59999	YR-TJ	YR-SC-MG	YR-SC-MG	PA-MG
Grand	VD5	Rolle	46.4519	6.35496	AF-LF-MA	AF-LF	AF-LF	AF-LF
Grand	VDP1	Pompage Lutry	46.4968	6.69288	YR	YR-SC-MG	YR-SC-MG	PA-MG
Grand	VDP2	Pompage Rolle	46.4565	6.34783	AF-LF-MA	AF-LF	AF-LF	AF-LF
Grand	VDP5	Lutry	46.5001	6.67916	YR-TJ	YR-SC-MG	YR-SC-MG	PA-MG
Grand	VS2	Le Bouveret	46.3888	6.85419	PV	PV	PV	PV
Grand	VS3	Villeneuve	46.4128	6.90202	JJS	PV	PV	PV
Grand	VS4	St. Gingolph	46.388	6.83424	PV	PV	PV	PV
Petit	CRG5	Nyon- Messery	46.3582	6.28171	JO-ER	JO	JO-DC	JO-DC
Petit	CRG6	Nyon- Messery	46.3707	6.26634	JO-ER	JO	JO-DC	JO-DC
Petit	CRG7	Nyon- Messery	46.3768	6.25351	JO-ER	JO	JO-DC	JO-DC
Petit	GE1	Rade de Genève	46.2102	6.15774	LL-NL	LL-NL	LL-NL	LL-NL
Petit	GE2	Fosse de Bellevue	46.2595	6.17512	LL-NL	LL-NL	LL-NL	LL-NL
Petit	GE3	Fosse de Chevrens	46.2972	6.21995	NR	NR	NR	NR
Petit	GE4	Fosse de Nyon	46.3745	6.27682	JO-ER	JO	JO-DC	JO-DC
Petit	GEP1	Pompage Genève	46.2403	6.16754	LL-NL	LL-NL	LL-NL	LL-NL
Petit	VDP3	Pompage Coppet	46.3214	6.20744	NR	NR	NR	NR
