# Supplementary material for: CoFish: co-designing citizen science between fishers and scientists to monitor the phosphorus distribution across two Lake Geneva basins
Source: Research Square preprint supplement (doi:10.21203/rs.3.rs-6170350/v1), 2025-05-07
Supplement: Supplementary file 2 [file 596120c3868597f370958abb.docx]

**Supplementary Table S1 Co-design workshop methodology**

**S1.** The tools used per action research step in CoFish, taken from (Cohen, Manion, and Morrison 2017). Most methods were adapted from the td-net toolbox (td-net 2019).

| **Action Research Step from Cohen 2017** | **Tools used in CoFish** |
| --- | --- |
| 1- Decide and agree on one common problem that you are experiencing or need that must be addressed | February-September 2021   - Stakeholder mapping with project partners that included stakeholders - Informal discussions with stakeholders prior to kick-off on project framing.   Oct 2021:   - Agreement of conditions of participation |
| 2- Identify some causes of the problem (need). | Oct 2021   - Workshop 1: “what matters to you in terms of the sustainability of fish populations?” (in person)   Nov 2021   - Vote on priorities (remotely) |
| 3- Brainstorm a range of possible practical solutions to the problem, to address the real problem and the real cause(s) | Jan-Feb 2022   - Workshop 2: design thinking from anecdotes to research questions (event and online)   Feb 2022   - Workshop 3: Refinement of research questions (online) |
| 4- From the range of possible practical solutions decide one of the solutions to the problem, perhaps what you consider to be the most suitable or best solution to the problem. Plan how to put the solution into practice. | March 2022   - Workshop 4: presentation of possible research questions, decisions based on feasibility and interest.   April 2022   - Workshop 5: Selection of two possible research lines (one later excluded due to feasibility issues)   May 2022   - Workshop 6: establishment and piloting protocol, recruitment strategy, sampling |
| 5- Identify some success criteria by which you will be able to judge whether the solution has worked to solve the problem, i.e. how will you know whether the proposed solution, when it is put into practice, has been successful. Identify some practical criteria that will tell you how successful the project has been. | Dec 2022   - Workshop 7: part of workshop dedicated to impact assessment and co-design of success indicators |
| 6- Put the plan into action; monitor, adjust and evaluate what is taking place. | Dec 2022   - Workshop 7: discussion of first pilot campaign, exchange of practices, standardisation of methods, troubleshooting |
| 7. Evaluate the outcome to see how well it has addressed and solved the problem or need, using the success criteria identified in Step 5. | Dec 2023   - Workshop 8 (Dec 2023)   - synthesis and presentation of results to fishers   - Impact assessment, project monitoring of indicators. - Interviews for learning outcomes (March-Nov 2022- follow-up January- Marc 2024) |
| 8. Review and plan what needs to be done in light of the evaluation. | Dec 2023   - Workshop 8: codesign of dissemination strategy   May 2024   - Workshop 9: Sustainability of project- best practices guide for future scientist- fisher collaborations. |

**References**

Cohen, Louis, Lawrence Manion, and Keith Morrison. 2017. *Research Methods in Education*. Routledge.

td-net. 2019. ‘Network for Transdiciplinary Research Td-Net: Methods and Tools for Co-Producing Knowledge’. *Swiss Academies of Arts and Sciences* (blog). 2019.<https://naturalsciences.ch/topics/co-producing_knowledge>.
