# Supplementary material for: CoFish: co-designing citizen science between fishers and scientists to monitor the phosphorus distribution across two Lake Geneva basins
Source: Research Square preprint supplement (doi:10.21203/rs.3.rs-6170350/v1), 2025-05-07
Supplement: Supplementary file 3 [file a0e5bf13a2bd9652c6123132.docx]

**INTERVIEW Protocols CoFish**

**1. Pre-test**

1. **Dimensions of engagement (Phillips et al. 2019)**
2. What is your current/past occupation?
3. How long have you been fishing on the lake?
4. Have you contributed to scientific research in the past? If yes, how?
5. How was your experience? What did you do for the project?
6. What kind of feedback did you receive in past projects?
7. Why did you decide to participate in CoFish?
8. What are your expectations towards the project? What do you hope to gain from participating?
9. Do you consider yourself as someone who likes science? Probe: What makes you say that?
10. Do you consider yourself as someone who uses science in your daily life? If yes, how? Probe: What makes you say that?

**B. Nature of Scientific Knowledge and Inquiry (selected from Lederman et al. 2002, 2014)**

Thank you, now I will ask you a few questions about how you think science and about how scientists work

1. Scientists produce scientific knowledge. Do you think this knowledge may change in the future? Explain your answer and give an example.
2. Scientists try to find answers to their questions by doing investigations / experiments. Do you think that scientists use their imaginations and creativity when they do these investigations / experiments?

If NO, explain why.

1. If YES, in what part(s) of their investigations (planning, experimenting, making observations, analysis of data, interpretation, reporting results, etc.) do you think they use their imagination and creativity? Give examples if you can.
2. If several scientists, working independently, ask the same question and follow **the same** procedures to collect data, will they necessarily come to the same conclusions? Explain why or why not.
3. If several scientists, working independently, ask the same question and follow different procedures to collect data, will they necessarily come to the same conclusions? Explain why or why not. (d) Does your response to (b) change if the scientists are working together ? Explain.
4. **Dimensions of engagement (Phillips et al. 2018) and learning**
5. One of the objectives of CoFish is to communicate about the project. As a little training we will do a little role play where I will play the role of one of your colleagues and you will attempt to explain the project to me.
6. Can you summarise in your own words what you did in CoFish?

[for each step probe] why did you do [this step]? What did it contribute to the project ?

3. Why is this science?

4. Imagine we need to run another sampling campaign, what would you say to your colleague to join the project? Why do you think the project is important?

5. Have you shared any information on the project with others?

[probe: friends, family, network?] What exactly? In what form? How often?

6. Have you undertaken any additional activities to learn about the project? ] Please give me an example. If so, why and how often? [probe: For example, the protocols, the data, the results?

7a. Did you learn anything that you didn’t know before? Example.

7b.Has participating in CoFish has altered your understanding of the topic of the ecology of lake ecosystems? What makes you say that?

What is it about your experience with CoFish that keeps you involved? Probe: What might cause you to participate more?

9. Does participating in CoFish make you feel part of the larger scientific community, as you see it? In what sense?

10. Imagine there is a problem that is affecting your neighbourhood, I don’t know it could be a pollution problem, an invasive species of flea and it is becoming a big problem in your neighbourhood. Do you think that you can play a role in solving this? [if yes: why and how?/ if no: why not?]

Follow-up:

Would you consider reaching out to scientists for help to resolve this issue? What would they contribute?

11. Do you think participating in CoFish has changed how you relate with science, scientists or scientific information? If so give us an example.

12. Do you expect your engagement in CoFish will lead you to take part in other science or environmental activities? Please describe if so, or why not?

**B. Nature of Scientific Knowledge and Inquiry (Lederman)**- as above.

Phillips, Tina B., Heidi L. Ballard, Bruce V. Lewenstein, and Rick Bonney. 2019. ‘Engagement in Science through Citizen Science: Moving beyond Data Collection’. Science Education 103 (3): 665–90. <https://doi.org/10.1002/sce.21501>.

Lederman, Norm G., Fouad Abd‐El‐Khalick, Randy L. Bell, and Renee S. Schwartz. 2002. ‘Views of Nature of Science Questionnaire: Toward Valid and Meaningful Assessment of Learners’ Conceptions of Nature of Science’. Journal of Research in Science Teaching 39 (6): 497–521.

Lederman, Judith S., Norman G. Lederman, Stephen A. Bartos, Selina L. Bartels, Allison Antink Meyer, and Renee S. Schwartz. 2014. ‘Meaningful Assessment of Learners’ Understandings about Scientific Inquiry—The Views about Scientific Inquiry (VASI) Questionnaire’. Journal of Research in Science Teaching 51 (1): 65–83.
