# Supplementary material for: CoFish: co-designing citizen science between fishers and scientists to monitor the phosphorus distribution across two Lake Geneva basins
Source: Research Square preprint supplement (doi:10.21203/rs.3.rs-6170350/v1), 2025-05-07

## **S3** Data validation and interlaboratory comparisons

The results of sampling stations on the French side of the lake were comparable to those run by the OLA (Observatoire Lacustre Alpin) lab, which runs the water analyses for CIPEL, in 8 out of 10 cases. Deviations could be due to poor mixing of the integrated lake sample before filling the two bottles, one for OLA and one for the Geneva lab. The data for CoFish sampling and analysis of TP at SHL2 were also comparable to those measured by OLA at similar time points. For P-PO4, the concentrations were close to the detection limit of 3μg/L and the readings for the OLA lab were below the Limit of Quantification.


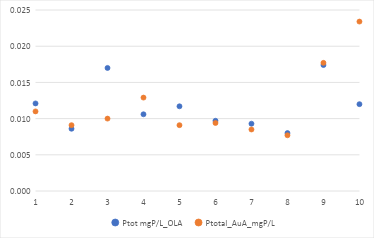

Supplement: Supplementary file 4 [file e8cf9937226dcc1808c417e2.docx]
